# Supplementary material for: The environment is very much firefighting and we’re trying to create that prevention narrative: Exploring the Implementation of Physical Activity Promotion within Primary care in England
Source: Research Square preprint supplement (doi:10.21203/rs.3.rs-7389726/v1), 2025-09-23
Supplement: Supplementary file 1 [file 7111295ac7b882e8d7624427.docx]

**Additional file 1: Consolidated Criteria for Reporting qualitative Research (COREQ)**

| Domain 1: Research team and reflexivity | |
| --- | --- |
| Personal Characteristics | |
| 1. Interviewer/facilitator | Detailed in methods section “Data collection”:  Interviewer, interview guide development, analysis, and drafting of manuscripts: Jimi Osinaike (JO)  Interview guide development, analysis, contributed to final manuscript: Sarah Hardcastle (SH)  Contributed to final manuscript: Rob Copeland (RC) |
| 1. Credentials | Jimi Osinaike (JO): MBBS, MSc (Sports and Exercise Medicine)  Sarah Hardcastle (SH): PhD/Associate Professor  Rob Copeland: PhD/Professor |
| 1. Occupation | JO: PhD student  SH: Associate Professor (Physical activity and health)  RC: Professor (Physical activity and health), Director, Advanced Wellbeing Research Centre. |
| 1. Gender | JO, RC: Male  SH: Female |
| 1. Experience and training | Interviewer: JO have some experience in qualitative research. He also they attended online training on qualitative data analysis  SH: Associate Professor with extensive expertise in qualitative research and interviewing, having designed and conducted multiple studies from conception to completion.  RC: Professor with extensive expertise in qualitative research and interviewing, having designed and conducted multiple studies from conception to completion. |
| Relationship with participants | |
| 1. Relationship established | The interviewees were health care professionals working within primary care in England. JO who collected the data and or analysed them (JO, SH) had no prior existing relationship with the interviewees. |
| 1. Participant knowledge of the interviewer | Interviewees were informed about the study, interviewer’s educational background and occupational status in advance. Participants had the chance to request further information regarding the provided information. |
| 1. Interviewer Characteristics | The interviewers have a research interest in physical activity and health especially in the area of embedding physical activity promotion within health care settings |
| Domain 2: Study design | |
| Theoretical Framework | |
| 1. Methodological orientation and theory | Reported in the methods section “Analysis”: Transcripts of the semi-structured topic guide interviews were analysed using thematic analysis |
| Participant selection | |
| 1. Sampling | Reported in the methods section. |
| 1. Method of approach | Reported in the methods section. |
| 1. Sample size | Reported in the methods section. |
| 1. Non-participation | Reported in the methods section. |
| Setting | |
| 1. Setting of data collection | Reported in the methods section “Data collection”:  Additional information: Interviews were conducted via Zoom and Microsoft Teams, . |
| 1. Presence of non-participants | No one else was present besides the participants and the interviewer. |
| 1. Description of Sample | Reported in the methods section. |
| Data Collection | |
| 1. Interview Guideline | The development of the interview guide is briefly described in the methods section “Data collection” and in Table 2 |
| 1. Repeat interviews | No repeat interview was necessary. |
| 1. Audio/Visual recording | Reported in the methods section “Data collection: Interviews were audio-recorded and transcribed verbatim, including pseudonymization. |
| 1. Field notes | No field notes were written. |
| 1. Duration | Not reported: Interview duration was an average of 45 minutes |
| 1. Data saturation | Reported in the methods section “Data collection”. |
| 1. Transcripts returned | Transcripts could not be returned to participants due to pseudonymization. However, interviewers continuously mirrored and confirmed descriptions during the interview to guarantee correct understanding. |
| Domain 3: Analysis and findings | |
| Data analysis | |
| 1. Number of data coders | Reported in the methods section “Analysis”:  Indexing all interviews and analysing: JO, SH  Summarizing and charting of the indexed data: JO |
| 1. Description of the coding tree | Reported in the methods section “Analysis”. |
| 1. Derivation of themes | Reported in the methods section “Analysis”. |
| 1. Software | Reported in the methods section “Analysis”. |
| 1. Participant checking | Not reported. |
| Reporting | |
| 1. Quotations presented | Quotations from different participants are presented to illustrate the findings, and a number identifies each quotation. |
| 1. Data and findings consistent | Yes |
| 1. Clarity of major themes | The perception that physical activity promotion within primary care is limited, and that the culture of primary care is largely oriented toward pharmacological treatment, emerged as important themes. |
| 1. Clarity of minor themes | As far as the word count permits, we discussed subthemes. |

**Additional file 2: Braun and Clarke six stages of thematic analysis**

| **Six-phase approach (Braun and Clarke) [53]** | **Actions taken by JO** | **Actions taken by supporting research team (SH and RC)** |
| --- | --- | --- |
| **Phase 1: Familiarization with transcripts** | Conducted interviews and generated transcripts  •  Read the transcripts several times, taking brief notes on key ideas and highlighting sections containing rich data. | Read through transcripts multiple times, making short notations of ideas and highlighting areas of rich data |
| **Phase 2: Coding** | Systematically review the transcripts, assigning codes to relevant sections of text that pertain to the research objectives.  •  Held the first research meeting after coding three transcripts. The goals were to address early challenges faced by coding members and to discuss notable segments of the transcripts.  • Hosted second and third research meetings after coding all transcripts. Same goals as the aforementioned  • Recoded all transcripts | Systematically read through transcripts, attaching codes to important sections of text which related to the research questions  • Attended coding meetings with SH and provided insight and perspective to specific sections of text  • Provided reflexive insights on their interpretations of the transcripts. |
| **Phase 3: Generating initial theme** | - Began to group codes into meaningful groups, which were clustered around an idea   • Inductively defined names for themes that were novel to this study | Provided critical feedback on the creation of themes |
| **Phase 4: Developing and reviewing themes** | Interrogated early themes with reference to transcripts to ensure that they captured the ideas presented by participants  • Developed a conceptual model for visualizing the interrelation of themes | • SH and RC provided critical feedback on the creation of themes |
| **Phase 5: Refining, defining, and naming themes** | Hosted a fourth research meeting with RC and SH to discuss the current interpretation of themes  • Flagged themes and subthemes where there was room to improve naming  • Created working definitions for themes and subthemes with reference to deductively incorporated themes | Attended research meetings to provide critical feedback on the status of themes  • Suggested alterations and considerations to theme and subtheme names and definitions |
| **Phase 6: Write-up** | Flagged powerful and relevant transcript quotations for each theme and subtheme  • Drafted manuscript  • Incorporated feedback of the research team | SH provided feedback on the strength of quotations and order of theme presentation  • Reviewed manuscript and provided feedback |
